# Supplementary material for: Multicoding in neural information transfer suggested by mathematical analysis of the frequency-dependent synaptic plasticity in vivo
Source: PubMed Central journal article supplement (PMC7435278; doi:10.1038/s41598-020-70876-4), 2020-08-18
Supplement: 41598_2020_70876_MOESM1_ESM.pdf [file 41598_2020_70876_MOESM1_ESM.pdf]

Supplementary Information for: Multicoding in  
neural information transfer suggested by  
mathematical analysis of the frequency-dependent  
synaptic plasticity in vivo

Katsuhiko Hata, Osamu Araki, Osamu Yokoi, Tatsumi Kusakabe,  
Yoshio Yamamoto, Susumu Ito, and Tetsuro Nikuni

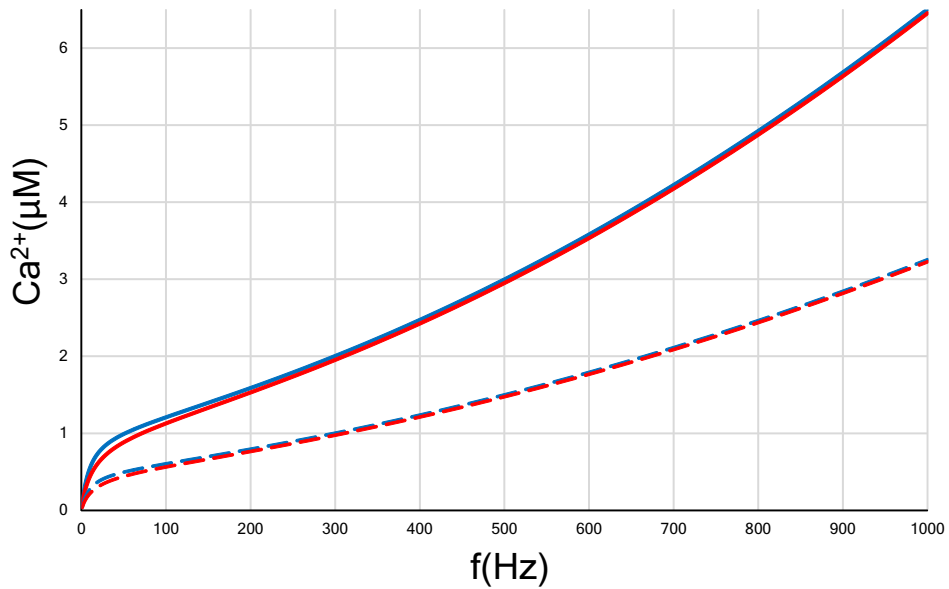

Figure S 1: Frequency dependence of the postsynaptic calcium concentration from 0 to 1000 Hz. In each graph, blue solid, red solid, blue dotted, red dotted lines indicate constant-ISI input to  $\tau_{Ca} = 80$  ms neurons, Poisson input to  $\tau_{Ca} = 80$  ms neurons, constant-ISI input to  $\tau_{Ca} = 40$  ms neurons and Poisson input to  $\tau_{Ca} = 40$  ms neurons, respectively.

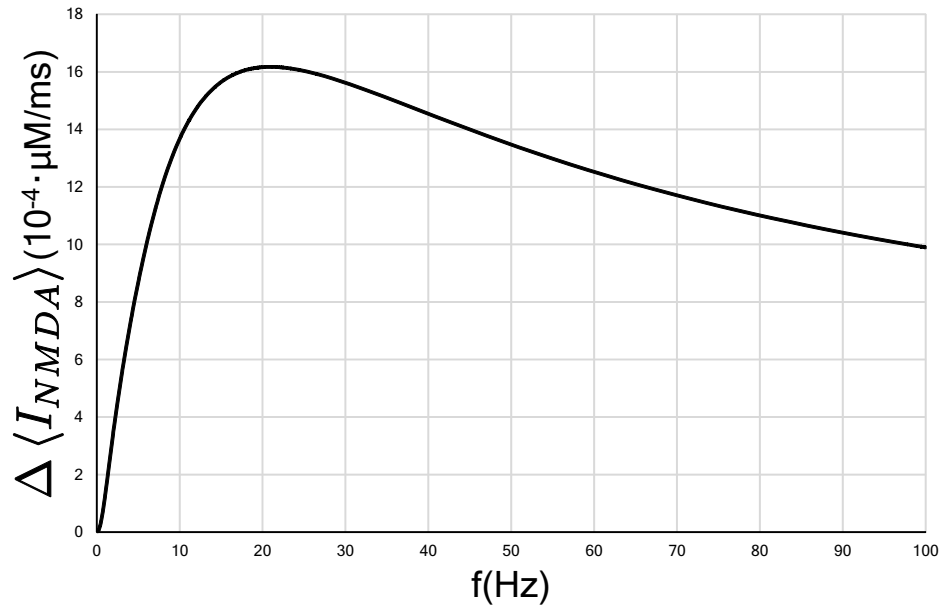

Figure S 2: A plot of  $\Delta \langle I_{NMDA}(f) \rangle$  which is defined by Eq. (8). The  $x$  axis indicates the input frequency, and the  $y$  axis represents the statistical average of the difference in  $I_{NMDA}$  at the post-synapse between constant-ISI and Poisson stimulation.
